# Supplementary material for: Anisotropic manganese antimonide nanoparticle formation by solution–solid–solid growth mechanism: consequence of sodium borohydride addition towards reduced surface oxidation and enhanced magnetic moment
Source: Royal Society of Chemistry journal article supplement (doi:10.1039/c8nr09142k), 2019-01-01
Supplement: c8nr09142k1.pdf [file c8nr09142k1.pdf]

## Electronic Supplemental Information

### Anisotropic Manganese Antimonide Nanoparticle Formation by Solution-Solid-Solid Growth Mechanism : Consequence of Sodium Borohydride Addition Towards Reduced Surface Oxidation and Enhanced Magnetic Moment

Malsha A. Hettiarachchi, Ehab Abdelhamid, Boris Nadgorny and Stephanie L. Brock

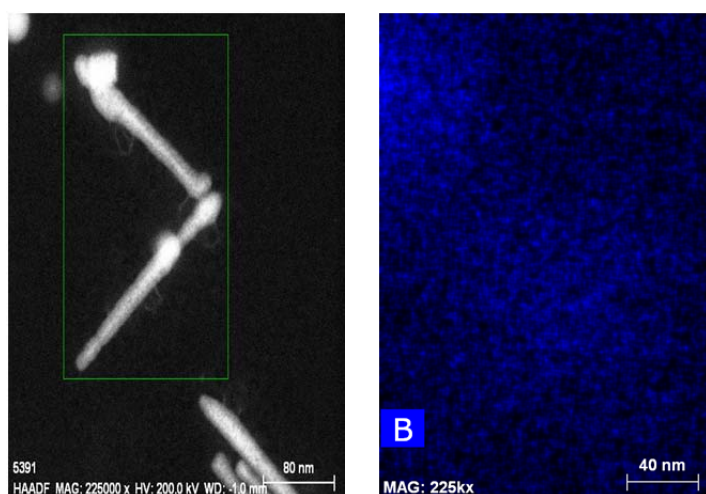

**Figure S1:** HAADF-STEM of MnSb nanoparticles synthesized in the presence of NaBH<sub>4</sub> and EDS mapping for B. The scale bar corresponds to 40 nm.

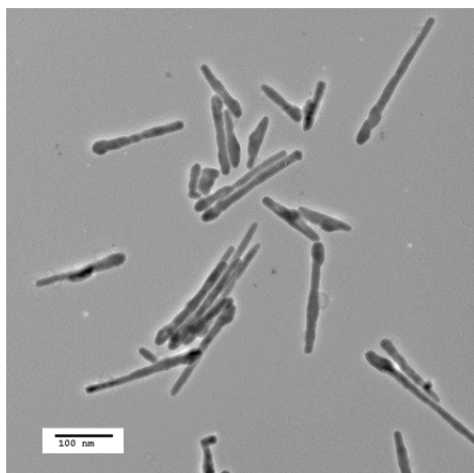

**Figure S2:** TEM image of MnSb nanoparticles reminiscent of peas in a pod synthesized in the presence of 2.64 mmol NaBH<sub>4</sub>

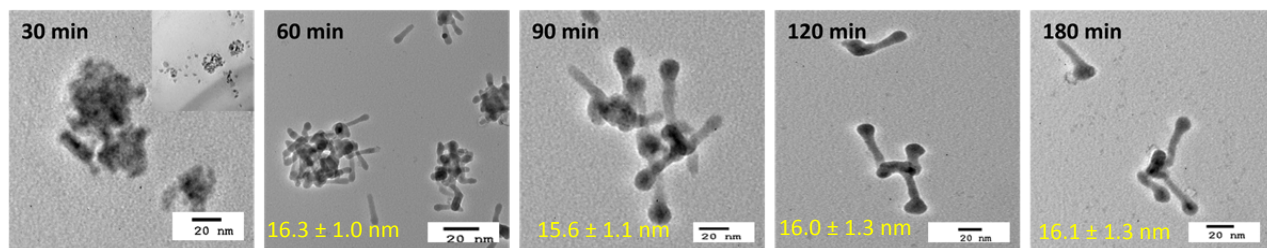

**Figure S3 (a):** TEM images of the fractions obtained at different time intervals (30, 60, 90, 120, 180 min) and quenched in cold chloroform from the reaction using near-stoichiometric  $\text{Mn}_2(\text{CO})_{10}$  and 0.53 mmol  $\text{NaBH}_4$

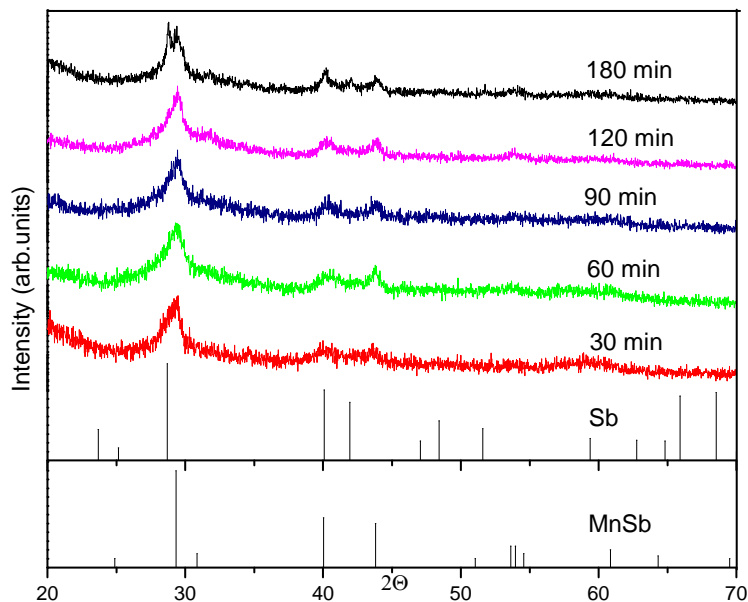

**Figure S3(b):** PXRD patterns of the fractions obtained at different time intervals (30, 60, 90, 120, 180 min) and quenched in cold chloroform from the reaction that used near-stoichiometric  $\text{Mn}_2(\text{CO})_{10}$  in the presence of  $\text{NaBH}_4$  (0.53 mmol)

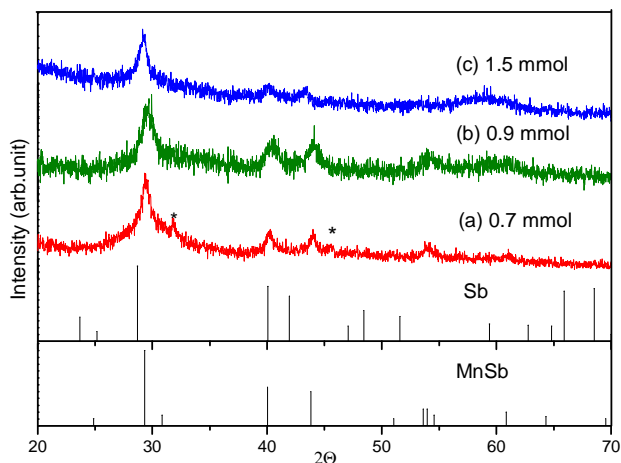

**Figure S4 (a-c):** PXRD patterns of MnSb nanoparticles synthesized in the presence of  $\text{NaBH}_4$  (0.79 mmol), using (a) 0.7 (b) 0.9 (c) 1.5 mmol (40, 80, 200% mole excess) of  $\text{Mn}_2(\text{CO})_{10}$ .  $\text{MnO}_2$  peaks are marked with asterisks (PDF #00-42-1169)

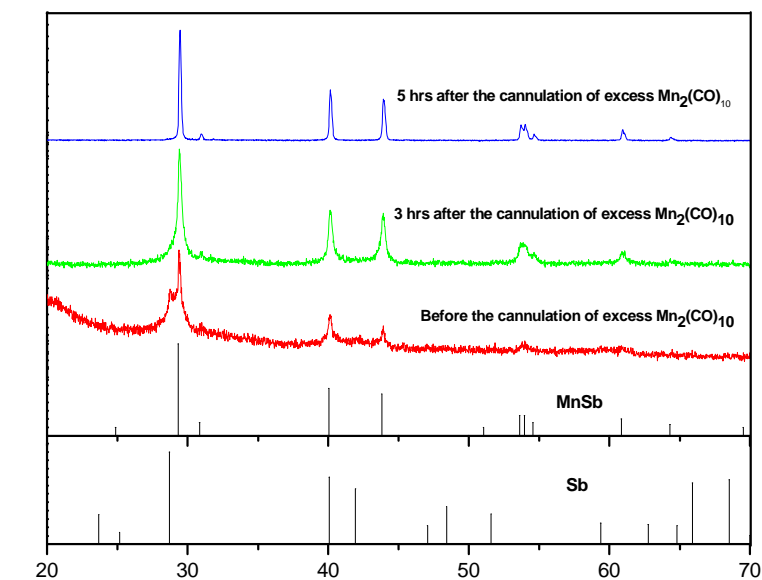

**Figure S5:** PXRD patterns of near-stoichiometric  $\text{Mn}_2(\text{CO})_{10}$  containing reaction mixture and upon the introduction of excess  $\text{Mn}_2(\text{CO})_{10}$  to the near-stoichiometric  $\text{Mn}_2(\text{CO})_{10}$  containing the reaction mixture after 3 and 5 h carried out in the presence of 1.59 mmol  $\text{NaBH}_4$ .

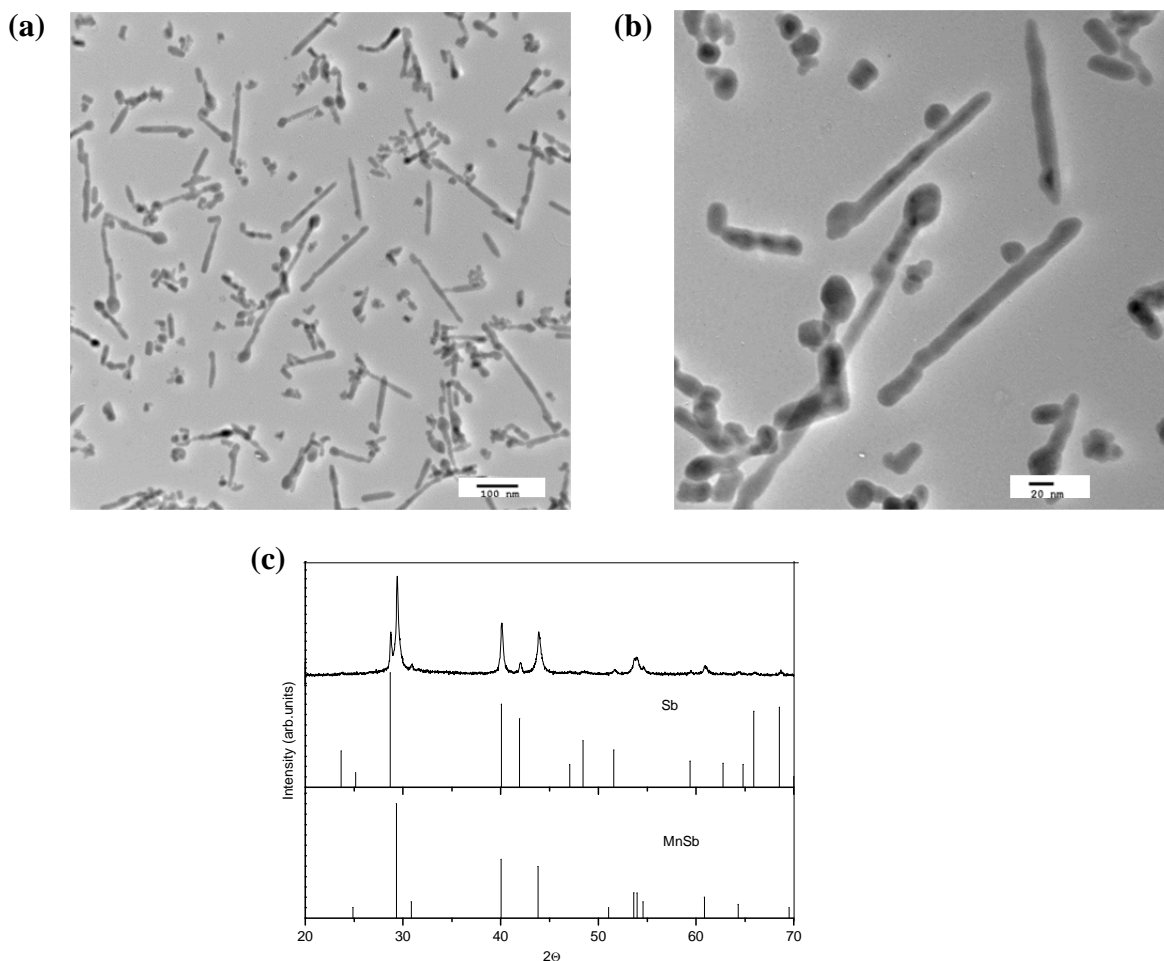

**Figure S6:** (a) Low magnification and (b) high magnification TEM images (c) PXRD pattern of the  $\text{MnSb}$  nanoparticles synthesized under near stoichiometric  $\text{Mn}_2(\text{CO})_{10}$  amount with  $\text{NaBH}_4$  (1.59 mmol) after heating for a total of 8 h
